# Supplementary material for: In Silico Inhibitability of Copper Carbenes and Silylenes against Rhizoctonia solani and Magnaporthe oryzae
Source: Hindawi journal article supplement (doi:10.1155/2021/5555521), 2021-12-30
Supplement: f1 [file 5555521.f1.doc]

*In silico* inhibitability of copper carbenes and silylenes against *Rhizoctonia solani* and *Magneporthe oryzae*

Nguyen Thi Thanh Hai1**,§**, Thanh Q. Bui1**,§**, Tran Thi Ai My1, Huynh Thi Phuong Loan1, Tran Thai Hoa1, Phan Tu Quy2*, Nguyen Thi Thu Thuy3, Dang Thanh Nhan4, Nguyen Thi Ai Nhung1*

*1Department of Chemistry, University of Sciences, Hue University, Hue City, 530000, Vietnam*

*2Department of Natural Sciences & Technology, Tay Nguyen University, Buon Ma Thuot City, 630000, Vietnam*

*3Faculty of Agronomy, University of Agriculture and Forestry, Hue University, Hue City, 530000, Vietnam*

*4Faculty of Forestry Agriculture, Tay Nguyen University, Buon Ma Thuot City, 630000, Vietnam*

§These authors contributed equally to this work

*Correspondence to:

Nguyen Thi Ai Nhung (E-mail: ntanhung@hueuni.edu.vn);

Phan Tu Quy (Email: phantuquy@ttn.edu.vn)

Supporting Information

| **Contents** | **Page** |
| --- | --- |
| **Table S1**. Cartesian coordinates of the optimised copper-carbenes **Cu-NHC1** and **Cu-NHC2** at the BP86/def2-SVP level of theory | 2 |
| **Table S2**. Cartesian coordinates of the optimised copper-silylenes **Cu-NHSi1** and **Cu-NHSi2** at the BP86/def2-SVP level of theory | 4 |

**Table S1**. Cartesian coordinates of the optimized copper-carbenes **Cu-NHC1** and **Cu-NHC2** at the BP86/def2-SVP level of theory

[CuCl-NHCH] (**Cu-NHC1**)

C -1.81989800 0.71218800 -0.00020800

C -1.81991000 -0.71216200 -0.00005100

C -3.02715800 -1.43670500 -0.00009100

C -4.22645900 -0.70659900 -0.00029100

C -4.22644700 0.70666600 -0.00044800

C -3.02713400 1.43675200 -0.00040800

C 0.34863100 -0.00000500 0.00001400

H -3.04079800 -2.53507800 0.00002900

H -5.18481800 -1.24841400 -0.00032400

H -5.18479700 1.24849800 -0.00060100

H -3.04075600 2.53512500 -0.00053200

Cl 4.32955600 0.00002200 -0.00014300

N -0.47610400 -1.10016400 0.00014000

N -0.47608400 1.10016800 -0.00010600

C 0.07426400 -2.47564300 0.00038500

H 1.17355700 -2.29670300 0.00038800

C -0.28600500 -3.23064300 1.28764400

H 0.02855000 -2.65611900 2.18200300

H -1.37329300 -3.43399900 1.36998800

H 0.24073700 -4.20619200 1.30586200

C -0.28594200 -3.23104800 -1.28665100

H -1.37323100 -3.43440600 -1.36899300

H 0.02867700 -2.65681700 -2.18117600

H 0.24078200 -4.20661200 -1.30452500

C 0.07430800 2.47563600 -0.00015900

H 1.17359600 2.29667700 -0.00011700

C -0.28595100 3.23092000 1.28693700

H -1.37323500 3.43431300 1.36923300

H 0.02859000 2.65658200 2.18142000

H 0.24080800 4.20646300 1.30494900

C -0.28588200 3.23077300 -1.28735800

H 0.02872400 2.65634300 -2.18176000

H -1.37316700 3.43413600 -1.36974200

H 0.24086200 4.20632200 -1.30544000

Cu 2.21874400 -0.00004500 0.00019500

[CuCl-NHCPh] (**Cu-NHC2**)

C -0.70917200 2.09087500 -0.14885400

C 0.70889500 2.09094700 -0.14885000

C 1.43836400 3.27482500 -0.35447100

C 0.70664700 4.45871700 -0.54304600

C -0.70717900 4.45864300 -0.54304500

C -1.43877000 3.27467300 -0.35447300

C -0.00002800 -0.08230200 0.08780300

H 2.53683000 3.27163300 -0.38512200

H 1.24778900 5.40341700 -0.70637100

H -1.24842000 5.40328700 -0.70636700

H -2.53723600 3.27136300 -0.38511800

Cl 0.00041600 -4.04737600 -0.23049700

N 1.09895000 0.74975100 0.00592000

N -1.09908400 0.74963900 0.00593300

C 2.44816200 0.27082600 0.08695300

C 3.37956300 0.92828100 0.91531500

C 2.82462800 -0.88014000 -0.63474200

C 4.69360400 0.43965200 1.00638900

H 3.06824800 1.80036400 1.50957300

C 4.13634400 -1.36796200 -0.52194400

H 2.08732600 -1.39590400 -1.27022900

C 5.07520800 -0.70823500 0.29018300

H 5.41788600 0.95246500 1.65854500

H 4.42233600 -2.27326200 -1.07944400

H 6.10370400 -1.09322300 0.37074600

C -2.44824400 0.27057000 0.08696000

C -3.37973300 0.92795700 0.91527500

C -2.82456000 -0.88047200 -0.63469000

C -4.69372500 0.43919400 1.00633000

H -3.06852800 1.80010400 1.50949900

C -4.13622500 -1.36843000 -0.52190500

H -2.08717700 -1.39618600 -1.27012200

C -5.07518500 -0.70876600 0.29016400

H -5.41808300 0.95196000 1.65844000

H -4.42210400 -2.27379000 -1.07936700

H -6.10364000 -1.09386300 0.37071800

Cu 0.00011600 -1.95144200 0.06772400

**Table S2**. Cartesian coordinates of the optimized copper-silylenes **Cu-NHSi1** and **Cu-NHSi2** at the BP86/def2-SVP level of theory

[CuCl-NHSiH] (**Cu-NHSi1**)

C 1.94848800 -0.72068600 -0.00013400

C 1.94850700 0.72065400 -0.00010000

C 3.17740000 1.41722100 -0.00019300

C 4.38527900 0.70407400 -0.00030300

C 4.38526100 -0.70417000 -0.00032300

C 3.17736300 -1.41728500 -0.00024100

H 3.19396300 2.51468100 -0.00018500

H 5.33799000 1.25589000 -0.00037500

H 5.33795700 -1.25601000 -0.00041000

H 3.19389800 -2.51474500 -0.00026900

Cl -4.84942900 0.00001600 0.00024300

N 0.65307700 1.25456300 0.00000800

N 0.65304400 -1.25456100 -0.00006400

C 0.29844600 2.69511800 0.00008100

H -0.81651100 2.68986900 0.00001800

C 0.73545500 3.41488900 1.28798100

H 0.36106000 2.87808700 2.18298500

H 1.83680000 3.49980100 1.37641000

H 0.31603700 4.44165800 1.30420700

C 0.73561600 3.41504000 -1.28768000

H 1.83697500 3.49992900 -1.37597300

H 0.36130500 2.87836200 -2.18279300

H 0.31622900 4.44182300 -1.30382100

C 0.29837200 -2.69510500 -0.00008400

H -0.81658600 -2.68982400 -0.00003000

C 0.73550100 -3.41500100 1.28770600

H 1.83685300 -3.49994300 1.37601200

H 0.36121200 -2.87827100 2.18279700

H 0.31606300 -4.44176200 1.30388200

C 0.73538200 -3.41492900 -1.28795400

H 0.36100100 -2.87815500 -2.18298000

H 1.83672800 -3.49985500 -1.37637000

H 0.31595200 -4.44169300 -1.30414400

Si -0.57613200 0.00001700 0.00003000

Cu -2.74103600 0.00002400 0.00014900

[CuCl-NHSiPh] (**Cu-NHSi2**)

C 0.78413000 -2.06589900 -0.17508800

C -0.64615400 -2.10686300 -0.17939500

C -1.31648500 -3.33121300 -0.37615000

C -0.56444700 -4.50285400 -0.55174300

C 0.84512700 -4.46230700 -0.54567700

C 1.52632200 -3.24894700 -0.36511500

H -2.41515800 -3.35954500 -0.40642200

H -1.08573100 -5.46011800 -0.70707500

H 1.42195400 -5.38802900 -0.69566100

H 2.62502800 -3.21259000 -0.38594000

Cl -0.20269100 4.70713400 -0.12937100

N -1.21941000 -0.82919500 -0.03961000

N 1.28360200 -0.75763800 -0.03350200

C -2.62809400 -0.59428900 0.05609700

C -3.41457900 -1.27140200 1.01484900

C -3.22696900 0.37326700 -0.77886100

C -4.78543100 -0.98943500 1.12074700

H -2.94173900 -2.00268100 1.68788600

C -4.59592800 0.66278200 -0.65210900

H -2.61187000 0.89566300 -1.52842400

C -5.38082300 -0.02182400 0.29092100

H -5.39096900 -1.52078900 1.87198300

H -5.05050000 1.42505000 -1.30400100

H -6.45516500 0.20095500 0.38342500

C 2.67858400 -0.44895200 0.06131500

C 3.49002100 -1.05471900 1.04638300

C 3.23549400 0.51589500 -0.80470500

C 4.84533600 -0.70450000 1.14845300

H 3.04750400 -1.78501900 1.74089900

C 4.58882100 0.87358200 -0.68304400

H 2.60045700 0.98074400 -1.57514400

C 5.39916400 0.26049200 0.28714800

H 5.47098600 -1.17994500 1.92037900

H 5.01137700 1.63274100 -1.35966000

H 6.46127700 0.53685200 0.37641000

Si -0.00314400 0.45047700 0.08887400

Cu -0.09143400 2.61102500 0.06772600
